1 **Prior hypotheses or regularization allow inference of diversification histories**  
2 **from extant timetrees**

3

4 **Hélène Morlon<sup>1,\*</sup>, Florian Hartig<sup>2</sup> & Stéphane Robin<sup>3</sup>**

5

- 6 1. Institut de Biologie de l'Ecole Normale Supérieure (IBENS), Ecole Normale Supérieure,  
7 CNRS, INSERM, PSL Research University, 75005 Paris, France  
8 2. Theoretical Ecology, University of Regensburg, Regensburg, Germany  
9 3. UMR MIA-Paris, AgroParisTech, INRA, Paris-Saclay University, 75005 Paris, France

10

11 \*corresponding author. email: [helene.morlon@bio.ens.psl.eu](mailto:helene.morlon@bio.ens.psl.eu)

12

13 **Abstract**

14 Phylogenies of extant species are widely used to study past diversification dynamics<sup>1</sup>. The  
15 most common approach is to formulate a set of candidate models representing evolutionary  
16 hypotheses for how and why speciation and extinction rates in a clade changed over time, and  
17 compare those models through their probability to have generated the corresponding  
18 empirical tree. Recently, Louca & Pennell<sup>2</sup> reported the existence of an infinite number of  
19 ‘congruent’ models with potentially markedly different diversification dynamics, but equal  
20 likelihood, for any empirical tree (see also Lambert & Stadler<sup>3</sup>). Here we explore the  
21 implications of these results, and conclude that they neither undermine the hypothesis-driven  
22 model selection procedure widely used in the field nor show that speciation and extinction  
23 dynamics cannot be investigated from extant timetrees using a data-driven procedure.

24

25

26 **Main text**

27 Louca & Pennell<sup>2</sup> consider the homogeneous (i.e. lineage-independent) stochastic birth-death  
28 process of cladogenesis traditionally used in macroevolution to test hypotheses about how and  
29 why rates of speciation (birth,  $\lambda$ ) and extinction (death,  $\mu$ ) have changed over time  $t$ . They  
30 show that for any given time-dependent speciation function  $\lambda > 0$  and extinction function  
31  $\mu \geq 0$ , there exists an infinite set of alternative functions  $\lambda^* > 0$  and  $\mu^* \geq 0$  such that the  
32 probability distribution of extant trees under the corresponding birth-death processes  $M$  and  
33  $M^*$  is identical. Consequently,  $M$  or  $M^*$  yield identical likelihood values for any given  
34 empirical tree. This identifiability issue is certainly both interesting and unfortunate, but what  
35 are its implications for phylogenetic-based diversification analyses?

36

37 We consider this question against two alternative philosophies to conducting science. The  
38 first is a hypothesis-driven research approach, in which a small number of alternative ideas  
39 about the underlying mechanism are compared against data<sup>4</sup>. An example is the foundational  
40 study of Nee *et al.* (1992)<sup>5</sup>, who examined one of the first molecular phylogenies of birds, and  
41 demonstrated that it was incompatible with a constant-rate diversification model. Grounded in  
42 Simpson's evolutionary theory of adaptive radiations<sup>6</sup>, they then hypothesized that rates of  
43 cladogenesis in birds might be affected by niche-filling processes. Finding that a diversity-  
44 dependent model indeed fitted their data better, they concluded that diversity-dependent  
45 cladogenesis was a more plausible scenario to explain the diversification of birds.

46

47 This hypothesis-driven approach has inspired more than 30 years of research in phylogenetic  
48 diversification analyses<sup>1</sup>. Exponential time-dependencies have been used, for example, to  
49 mimic early burst patterns expected from adaptive radiation theory<sup>6</sup>, or as an approximation to  
50 diversity-dependent cladogenesis<sup>7</sup>. In the context of the environment-dependent models

51 mentioned by Louca & Pennell<sup>2</sup>, functional hypotheses have often been derived from  
52 foundational theories of biodiversity, such as the metabolic theory of biodiversity<sup>8</sup> and  
53 MacArthur & Wilson's theory of island biogeography<sup>9</sup>. Phenomenological models, such as  
54 simple linear time- or environmental-dependencies, have indeed also been used, but typically  
55 either as null models<sup>7</sup> or as the simplest way to model the effect of an explanatory  
56 environmental variable on evolutionary rates<sup>8,10</sup>. The primary goal of this research, however,  
57 has been to fit, test and compare diversification scenarios that were defined *a priori* to reflect  
58 different evolutionary hypotheses.

59  
60 Louca & Pennell's congruent models  $M^*$ , on the other hand, do not correspond *a priori* to any  
61 evolutionary hypotheses, and would never be considered in a well-conducted hypothesis  
62 model selection procedure in the first place<sup>4</sup>. Fortunately, as Louca & Pennell<sup>2</sup> admit, most  
63 diversification hypotheses that are compared by evolutionary biologists are distinguishable  
64 from extant trees, and the ongoing effort to integrate fossil information provides even brighter  
65 perspectives<sup>11</sup>. The existence of a large number of congruent models therefore poses no direct  
66 challenge to the traditional hypothesis-driven research approach. The only possible concern is  
67 the question of model selection consistency: if the true model is not in the set of considered  
68 models, do we select the correct hypothesis? This question has not been answered one way or  
69 the other and would require thorough investigation in future research.

70  
71 By considering all possible diversification functions, Louca & Pennell<sup>2</sup> implicitly subscribe to  
72 a different method of scientific discovery, where the goal is to learn  $\lambda$  and  $\mu$  from the data  
73 alone. After finding that these quantities are not simultaneously identifiable, even for  
74 infinitely large phylogenies, they suggest to instead estimate identifiable quantities such as the  
75 pulled speciation rate  $\lambda_p$  or pulled diversification rate  $r_p$ . There are certainly advantages of

76 the pulled rates, but estimating them from limited-size phylogenies is still a challenging task  
77 (SI S.1). One could address the problem by regularization, but then the question arises why  
78 we should not directly use regularization to handle the identifiability issue around  $\lambda$  and  $\mu$ .  
79 Indeed, a wide body of statistical regularization techniques exist to deal with unidentifiability  
80 issues<sup>12</sup>, such as shrinkage<sup>13</sup>, smoothing<sup>14</sup> or the use of Bayesian priors. Louca & Pennell<sup>2</sup> do  
81 not address the possibility to use such statistical regularization methods, although these  
82 methods have already been used successfully for inference of diversification rates<sup>15,16</sup> (SI  
83 S.2).

84  
85 To provide a concrete example of these points, we perform an analysis of the diversification  
86 of the Madagascan vangas in the logic that would be applied in the field<sup>17</sup>, but simplified for  
87 illustrative purposes. We hypothesize that diversification followed an ‘Early Burst’ pattern<sup>18</sup>,  
88 with fast speciation at the origin of the group and subsequent slowdown, rather than constant-  
89 rate diversification. The Early Burst pattern, related to the idea of adaptive radiations<sup>6</sup>, is  
90 modeled by an exponential decay of the speciation rates through time, used as an  
91 approximation of diversity-dependence. We also consider the hypothesis that a substantial  
92 number of extinction events occurred during the diversification of this group. Among the four  
93 corresponding models, the model with exponential change and no extinction (M) is best  
94 supported by the data (see Table 1 & Supplementary Information). M is characterized by  
95  $\lambda(t) = \lambda_0 e^{\alpha t}$  and  $\mu(t) = 0$  where  $t$  is measured from the present to the past,  $\lambda_0 = 0.018$  is  
96 the estimated present-day speciation rate, and  $\alpha = 0.1$  measures the estimated speed of time  
97 change. A positive  $\alpha$  reflects a decline in speciation rate from the origin of the group to the  
98 present (Fig. 1). We conclude that the hypothesis of Early Burst diversification with  
99 negligible extinctions is the most likely of the four hypotheses we considered.

101 We now follow Louca & Pennell<sup>2</sup> by solving Eq. 2 for models congruent to our best model  
102 M. First, we choose the extinction function to be a constant  $\mu_1^*(t) = \mu_0$  and compute  $\lambda_1^*(t)$ .  
103 Second, we choose the speciation function to be a constant  $\lambda_2^*(t) = \lambda_0$  and compute  $\mu_2^*(t)$ .  
104 We find (SI; see the corresponding inferred dynamics in Fig. 1):

105

$$106 \quad \lambda_1^*(t) = \frac{\lambda_0 e^{-\frac{\lambda_0}{\alpha} t} e^{(\alpha+\mu_0)t} e^{\frac{\lambda_0}{\alpha} e^{\alpha t}}}{1 + \lambda_0 e^{-\frac{\lambda_0}{\alpha} t} \int_0^t e^{(\alpha+\mu_0)s} e^{\frac{\lambda_0}{\alpha} e^{\alpha s}} ds}$$

107

108 and

$$109 \quad \mu_2^*(t) = \lambda_0 - \alpha - \lambda_0 e^{\alpha t}$$

110

111 The biological interpretation of these additional models and of their parameters is not  
112 obvious. The equation for  $\mu_2^*$  looks more interpretable at first, but it expresses the temporal  
113 change and the extinction rate at present through the same parameter  $\alpha$ , which means that a  
114 positive extinction rate at present ( $\alpha < 0$ ) will force extinction rates to decline over time.

115 Here  $M_2^*$  infers negative extinction rates, and is therefore not plausible (Fig. 1).  $M_1^*$  infers a  
116 decline in speciation rate from the origin of the group to the present for extinction rates  $\mu_0$   
117 ranging from at least 0.05 to 0.3, consistent with our previous results (Fig. 1). While rate  
118 estimates do vary substantially, the general temporal trend is preserved.

119

120 Finally, we fit  $r_p$  directly with spline functions, as suggested by Louca & Pennell<sup>2</sup> (SI S.3),  
121 and deduce  $\lambda$  (or  $\mu$ ) when assuming  $\mu$  (or  $\lambda$ ) constant. General diversification trends are  
122 consistent with those found above; finer dynamics depend on the choices made to estimate  $r_p$   
123 and suggest interesting new hypotheses to test (SI S.3). Here we chose  $\lambda$  or  $\mu$  to be constant to  
124 simplify the problem. Data-driven approaches have relaxed this hypothesis while still

125 estimating global temporal tendencies accurately, based on the reasonable prior belief that  
126 rates don't change much in a small amount of time<sup>15</sup>. We expect such or similar regularization  
127 approaches to eliminate the pathological cases with markedly different diversification  
128 histories shown in Louca & Pennell<sup>2</sup>.

129

130 There are useful results in Louca & Pennell's paper. The pulled diversification rate is difficult  
131 to interpret biologically, yet realizing that models are only distinguishable by this quantity is  
132 important, and the approach might provide an interesting way to generate new hypotheses.

133 The implications of these results for diversification analyses, however, are largely  
134 overinterpreted, mainly because the constraints imposed by the practice of hypothesis-driven  
135 research, prior knowledge, and the possibilities to penalize complexity are not considered in  
136 the paper. A very similar identifiability issue occurred 10 years ago in population genetics,  
137 when it was shown that the widely-used allelic frequency spectrum (AFS) is consistent with a  
138 myriad of demographic histories<sup>19</sup>. Despite this insight, the AFS – along with other data  
139 sources – remains a prominent approach of demographic inference<sup>20</sup>. Identifiability issues  
140 naturally arise in approaches that try to infer the potentially unlimited complexity of historical  
141 processes from limited contemporary data, and this is why we work hypothesis-driven,  
142 develop regularization techniques, and integrate other data types. Louca & Pennell<sup>2</sup> remind us  
143 that the hypotheses we formulate when we develop models influence the conclusions we  
144 draw, and that these conclusions should always be taken with a grain of salt; this is always a  
145 good reminder, but it does not compromise the current practice in the field.

146

147 **References**

148

- 149 1. Morlon, H. Phylogenetic approaches for studying diversification. *Ecol. Lett.* **17**, 508–  
150 525 (2014).
- 151 2. Louca, S., Pennell, M.W. Extant timetrees are consistent with a myriad of  
152 diversification histories. *Nature* **580**, 502–505 (2020).
- 153 3. Lambert, A. & Stadler, T. Birth–death models and coalescent point processes: the  
154 shape and probability of reconstructed phylogenies. *Theor. Popul. Biol.* **90**, 113–128  
155 (2013).
- 156 4. Burnhan, K., Anderson, D. R. Model Selection and Multimodel Inference. *Springer*,  
157 *New York* (2002).
- 158 5. Nee, S., Mooers, A. O., Harvey, P. H. Tempo and mode of evolution revealed from  
159 molecular phylogenies. *Proc. Natl Acad. Sci. USA* **89**, 8322–8326 (1992).
- 160 6. Simpson G.G The Major Features of Evolution. *Columbia Univ Press, New York*  
161 (1953).
- 162 7. Rabosky, D. L., Lovette, I. J. Density-dependent diversification in North American  
163 wood warblers. *Proc. Royal Soc. B* **275**, 2363–2371 (2008).
- 164 8. Condamine, F. L., Rolland, J., Morlon, H. Assessing the causes of diversification  
165 slowdowns: temperature-dependent and diversity-dependent models receive  
166 equivalent support. *Ecol. Lett.* **22**, 1900–1912 (2019).
- 167 9. Valente, L. et al. A simple dynamic model explains the diversity of island birds  
168 worldwide. *Nature* **579**, 92–96 (2020).
- 169 10. Clavel, J., Morlon, H. Accelerated body size evolution during cold climatic periods in  
170 the Cenozoic. *Proc. Natl Acad. Sci. USA* **114**, 4183–4188 (2017).
- 171 11. Heath, T. A., Huelsenbeck, J. P., Stadler, T. The fossilized birth–death process for  
172 coherent calibration of divergence-time estimates. *Proc. Natl Acad. Sci. USA* **111**,  
173 E2957–E2966 (2014).

- 174 12. Hastie, T., Tibshirani, R., & Friedman, J. The elements of statistical learning: data  
175 mining, inference, and prediction. *Springer Science & Business Media* (2009).
- 176 13. Zou, H., & Hastie, T. Regularization and variable selection via the elastic net. *J. R.*  
177 *Stat. Soc. B*, **67**, 301-320 (2005).
- 178 14. Wood, S. N., Pya, N., & Säfken, B. Smoothing parameter and model selection for  
179 general smooth models. *J. Am. Stat. Assoc.*, *111*(516), 1548-1563 (2016).
- 180 15. Maliet, O., Hartig, F., Morlon, H. A model with many small shifts for estimating  
181 species-specific diversification rates. *Nat. Ecol. Evol.* **7**, 1086-1092 (2019).
- 182 16. Magee, A. F., Höhna, S., Vasylyeva, T. I., Leaché, A. D., Minin, V. N. Locally  
183 adaptive Bayesian birth-death model successfully detects slow and rapid rate shifts.  
184 *bioRxiv*, 853960. (2019).
- 185 17. Jønsson, K. A. et al. Ecological and evolutionary determinants for the adaptive  
186 radiation of the Madagascan vangas. *Proc. Natl Acad. Sci. USA* **109**, 6620–6625  
187 (2012).
- 188 18. Harmon, L. J. et al. Early bursts of body size and shape evolution are rare in  
189 comparative data. *Evolution* **64**, 2385–2396 (2010).
- 190 19. Myers, S., Fefferman, C., & Patterson, N. Can one learn history from the allelic  
191 spectrum? *Theor. Popul. Biol.* **73**, 342–348 (2008).
- 192 20. Ragsdale, A. P., Moreau, C., & Gravel, S. Genomic inference using diffusion models  
193 and the allele frequency spectrum. *Curr. Opin. Genet. Dev.* **53**, 140–147 (2018).
- 194 21. Morlon, H., Lewitus, E., Condamine, F. L., Manceau, M., Clavel, J., & Drury, J.  
195 RPANDA: an R package for macroevolutionary analyses on phylogenetic trees.  
196 *Methods Ecol. Evol.* **7**, 589–597 (2016).
- 197



198 **Acknowledgments** We thank Amaury Lambert and the Morlon (current and past) research  
 199 team, in particular Ignacio Quintero, Isaac Overcast, Jonathan P. Drury, Odile Maliet, and  
 200 Julien Clavel for discussions. We also thank Knud Jønsson for providing us with the  
 201 Madagascan vanga tree. H. Morlon acknowledges funding from the ERC (grant ERC-CoG  
 202 PANDA).

203

204

205 **Table 1. Diversification models fitted to the phylogeny of the Madagascan vangas**

206

| Model                                                      | nb | Log L  | AICc   | $\Delta$ AIC | $\lambda_0$ | $\alpha$ | $\mu_0$  |
|------------------------------------------------------------|----|--------|--------|--------------|-------------|----------|----------|
| Exponential change of speciation rate, no extinction (M)   | 2  | -71.29 | 147.21 | 0            | 0.018       | 0.102    | -        |
| Exponential change of speciation rate, constant extinction | 3  | -71.04 | 149.4  | 2.19         | 0.025       | 0.117    | 0.077    |
| Constant speciation, no extinction                         | 1  | -76.09 | 154.37 | 7.17         | 0.06        | -        | -        |
| Constant speciation, constant extinction                   | 2  | -76.09 | 156.80 | 9.6          | 0.06        | -        | 3.39e-09 |

207 nb denotes the number of parameters. LogL stands for the maximum log-likelihood, AICc for the second order Akaike  
 208 Information Criterion<sup>4</sup>, and  $\Delta$ AIC for the difference in AICc between the model and the best model in the set. Models are ranked based on  
 209 their AICc support.  $\lambda_0$  is the estimated speciation rate at present,  $\alpha$  is the estimated rate of change of speciation with time (a positive  $\alpha$   
 210 reflects a rate decline), and  $\mu_0$  is the estimated extinction rate. Fits were performed using the *fit\_bd* function from RPANDA<sup>21</sup> using the  
 211 “crown” conditioning and a sampling fraction of 1 (the tree of the Madagascan vangas is complete<sup>17</sup>).

212

213

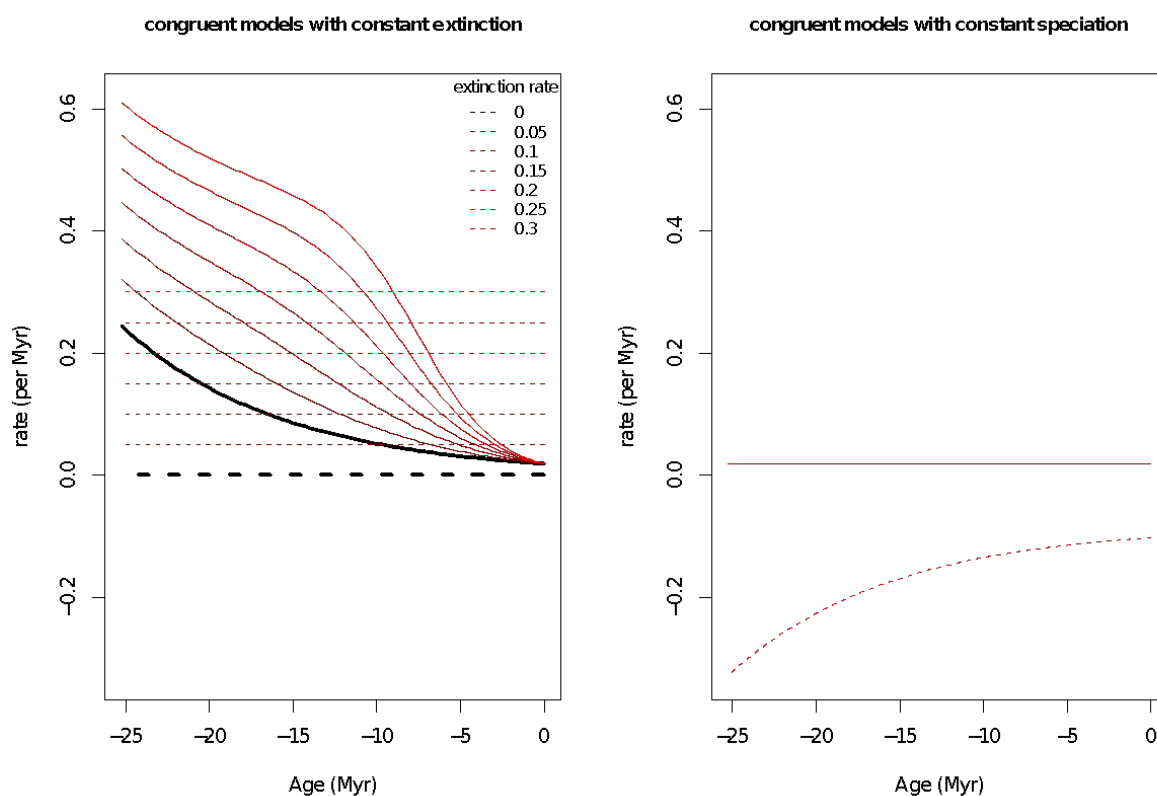

214

215 **Figure 1 Diversification of the Madagascan vangas as inferred from congruent models.**

216 The black curves on the left panel represent the dynamics of speciation (plain line) and

217 extinction (dashed line) corresponding to our best-fit model M (exponential decline in

218 speciation rate, non-significant extinctions). The colored curves illustrate the rate dynamics of

219 congruent models obtained by: fixing increasing values of a constant extinction rate (left

220 panel,  $M_1^*$ ) and fixing the speciation rate to  $\lambda_0$  (right panel,  $M_2^*$ ). Note that  $M_1^*$  infers a

221 speciation rate decline regardless of the assumed extinction rate.

222

223

224

225

226

## 227 **Supplementary Information**

228

### 229 **S.1 Fitting the pulled rates also requires model selection or regularization**

230 In their S9, Louca & Pennell explain how to obtain non-parametric estimates of  $\lambda_p$  and  
231  $r_p$  from empirical timetrees by maximum likelihood. We note that, as for any non-parametric  
232 approach, these estimates rely on two non-independent and somewhat arbitrary choices: a) the  
233 functional basis (e.g. piecewise-polynomial, wavelets, Fourier) and b) the form of the  
234 regularization (e.g. smoothness, sparsity). For phylogenies of a few hundred of species, which  
235 is the data size typical for the application of the homogenous rate models considered by  
236 Louca & Pennell, the final estimates will depend on both choices. In other words, although  $\lambda_p$   
237 and  $r_p$  are theoretically (i.e. for infinitely large phylogenies) identifiable, in practice they must  
238 be estimated from limited data. Without fixed hypotheses or constraints on functional  
239 complexity, the exact estimation of the pulled rates can therefore still be challenging. For  
240 example, Louca & Pennell chose a spline between an arbitrary number of discrete times as the  
241 functional basis. As we illustrate below, the choice of the degree of the spline and of the  
242 number of discrete times can influence estimates (see S.3). Our point is that some constraints,  
243 either in the form of fixed hypotheses that are chosen *a priori*, or in the form of constraints on  
244 model complexity, are fundamentally unavoidable in the problem of inferring diversification  
245 histories from extant time trees.

246

### 247 **S.2 Regularization techniques can allow inference of diversification histories despite** 248 **unidentifiability**

249 Louca & Pennell write that “common model selection methods that are based on  
250 parsimony or ‘Occam’s razor’ (such as the Akaike information criterion) generally cannot  
251 resolve these issues” (i.e. issues of model congruence). We first note that the Akaike

252 information criterion is designed to account for the number of parameters in a (parametric)  
253 model, while most data-driven approaches are non-parametric. In the latter case, other  
254 approaches that are regularly used in statistics and machine learning to deal with issues of  
255 unidentifiability and over-parametrization include the use of shrinkage<sup>13</sup> or smoothing<sup>14</sup>  
256 estimators, or of Bayesian priors. The authors don't discuss these approaches, but we see no  
257 reason why they should not be considered in this case.

258         Regarding the use of model selection, two main arguments are provided by the authors  
259 for dismissing these techniques as a possible solution to the identifiability problem (section  
260 S2 in Louca & Pennell's paper, the third argument is essentially the same as the first). The  
261 first argument is that "There is little reason to believe that the simplest scenario in a  
262 congruence class will be the one closest to the truth. Indeed, even if the true model is included  
263 in a congruence class, it will almost always be the case that there are both simpler and more  
264 complex scenarios within the same congruence class and, crucially, all of these alternative  
265 models remain equally likely even with infinitely large datasets." Nothing about this  
266 statement is specific to birth-death models adjusted to timetrees, and thus we must conclude  
267 that the authors question the principle of parsimony (or Occam's razor) in general. The  
268 authors are of course entitled to their opinion, as the principle of parsimony is not a  
269 mathematically provable law, but we note that this opinion contradicts centuries of thinking  
270 and experience from physics to machine learning, and from philosophy as well. If we follow  
271 the traditional thinking in science when presented with the situation highlighted by Louca &  
272 Pennell (i.e. scenarios with different degrees of complexity but equal likelihood), we should  
273 select the simplest scenario, because, although there is no guarantee that this scenario is the  
274 closest to the truth, the parsimony principle suggests that it is most probably true, all other  
275 things equal.

276           The second argument by Louca & Pennell is that the complexity of a diversification  
277 scenario cannot be quantified. Note that this argument is only relevant if one accepts the  
278 parsimony principle in the first place, or else complexity is irrelevant for model selection. We  
279 agree with Louca & Pennell that quantifying complexity (or its opposite: simplicity) is a hard  
280 question, and one that is not always well-addressed by simply counting the number of  
281 parameters (the number of parameters is in particular not meaningful in non-parametric data-  
282 driven approaches). However, this again is not specific to birth-death models adjusted to  
283 timetrees, and a wide body of statistical literature exists that deals with this problem<sup>12</sup>. A  
284 review of this literature is beyond the scope of this discussion, but there are various routes to  
285 quantifying or penalizing complexity, such as information-theoretical measures (in particular  
286 the principle of maximum entropy<sup>22</sup>), other Bayesian and frequentist model selection  
287 approaches, and shrinkage or regularization estimators that essentially amount to setting  
288 priors on the parameters or smoothness of a curve. While we agree that choosing among those  
289 methods has a degree of subjectivity, we see no reason why complexity cannot be quantified  
290 for diversification scenarios. It seems to us that the problem is very similar to the general  
291 situation in data-driven analysis (starting from linear regressions), where we can always build  
292 more complex models with equal likelihood, but know for various reasons (parsimony, bias-  
293 variance trade-off) that adding complexity brings disadvantages, and thus add penalizations or  
294 other regularization methods to balance the complexity of the explanation. There have already  
295 been a few studies that tested regularization approaches for inference of diversification  
296 rates<sup>15,16,23</sup>, but the study by Louca & Pennell highlights the need for more research in this  
297 field, to explore what regularization methods work best.

298           Louca & Pennell also allude to the fact that the problem highlighted in their study is  
299 independent of sample size. We agree that this makes the situation somewhat different from  
300 some other model selection and regularization problems, but we do not see how this is

301 relevant in a practical data analysis, where the size of the timetree is fixed and typically not  
302 huge (in particular if we assume homogeneous rates), meaning that the problem at hand is to  
303 draw inference from limited data.

304

### 305 **S.3 Illustration with the Madagascan vangas**

306 Here we begin by exploring models congruent to M, the model selected among the  
307 four models we considered in our illustrative hypothesis-driven model selection procedure on  
308 the Madagascan vangas tree. M is characterized by  $\lambda(t) = \lambda_0 e^{\alpha t}$  and  $\mu(t) = 0$  where  $t$  is  
309 measured from the present to the past,  $\lambda_0 = 0.018$  is the estimated present-day speciation  
310 rate, and  $\alpha = 0.1$  measures the estimated speed of time change.

311 We first choose the extinction function to be a constant  $\mu_1^*(t) = \mu_0$  and compute  
312  $\lambda_1^*(t)$ . Note that the corresponding model  $M_1^*$  has 3 parameters ( $\lambda_0$ ,  $\alpha$  and  $\mu_0$ ) while M has  
313 only 2 ( $\lambda_0$  and  $\alpha$ ), such that it would not be selected over M based on Occam's razor.  $M_1^*$   
314 would not be selected either if compared to the model ranked second in our analysis  
315 (exponential change of speciation rate and significant extinctions), as it has the same number  
316 of parameters and a lower likelihood (Table 1). We compute  $\lambda_1^*(t)$  using the solution to Eq.2  
317 from Louca & Pennell<sup>2</sup>, provided in their SI (Eq. 39 & 40), with  $\eta_0 = \lambda_0$  (here the sampling  
318 fraction  $\rho = 1$ , as the Madagascan vangas tree is complete<sup>17</sup>):

319

$$320 \quad \lambda_1^*(t) = \frac{\lambda_0 e^{\Lambda(t)}}{1 + \lambda_0 \int_0^t e^{\Lambda(s)} ds}$$

321 with

$$322 \quad \Lambda(t) = \int_0^t [r_p(s) + \mu_0] ds.$$

323

324  $r_p$ , the 'pulled diversification rate', is given by Eq. 1 from Louca & Pennell<sup>2</sup>:

325

$$326 \quad r_p = \lambda - \mu + \frac{1}{\lambda} \frac{d\lambda}{dt} = \lambda_0 e^{\alpha t} + \alpha.$$

327 This gives:

$$328 \quad \Lambda(t) = \frac{\lambda_0}{\alpha} (e^{\alpha t} - 1) + (\alpha + \mu_0)t$$

329

330 and

$$331 \quad e^{\Lambda(t)} = e^{-\frac{\lambda_0}{\alpha}} e^{(\alpha + \mu_0)t} e^{\frac{\lambda_0}{\alpha} e^{\alpha t}}.$$

332 Finally:

$$333 \quad \lambda_1^*(t) = \frac{\lambda_0 e^{-\frac{\lambda_0}{\alpha}} e^{(\alpha + \mu_0)t} e^{\frac{\lambda_0}{\alpha} e^{\alpha t}}}{1 + \lambda_0 e^{-\frac{\lambda_0}{\alpha}} \int_0^t e^{(\alpha + \mu_0)s} e^{\frac{\lambda_0}{\alpha} e^{\alpha s}} ds}.$$

334

335 Second, we choose the speciation function to be a constant  $\lambda_2^*(t) = \lambda_0$  and compute  
 336  $\mu_2^*(t)$ . The corresponding model  $M_2^*$  has the same number of parameters as M. Solving Eq. 2  
 337 from Louca & Pennell<sup>2</sup> with  $\frac{d\lambda_2^*}{dt} = 0$  gives:

338

$$339 \quad \mu_2^*(t) = \lambda_2^* - r_p = \lambda_0 - \alpha - \lambda_0 e^{\alpha t}.$$

340

341 Next, we explore congruent models found by directly fitting  $r_p$  to the tree, following  
 342 the procedure outlined in Louca & Pennell's SI (section S9), and with the same choice of  
 343 keeping either  $\lambda$  or  $\mu$  constant. We used the *fit\_hbd\_pdr\_on\_grid* function from the R package  
 344 *castor*<sup>23</sup> to fit  $r_p$ . This function fits  $r_p$  assuming a piecewise spline function on a predefined  
 345 "grid", i.e. discrete times between which  $r_p$  varies as a spline. As we did not find specific  
 346 recommendations on how to define the grid, we chose evenly-spaced times, and selected their  
 347 number using the AIC criterion (we note though that the AIC is not a good criterion for

348 rupture detection<sup>25</sup>). We followed the recommendation from the help of the  
349 *fit\_hbd\_pdr\_on\_grid* function to not use a spline of degree zero (i.e. piecewise constant); we  
350 used a spline of degree of 1 (piecewise linear) and 2.

351 Using a spline of degree 1, we selected 3 times, and the resulting diversification  
352 dynamics are shown in Fig. S1. The model that assumes  $\lambda$  is constant infers negative  
353 extinction rates, and is therefore not plausible. The model that assumes  $\mu$  is constant infers a  
354 general tendency for a decline in speciation rates, with a local peak around 7 Myrs ago. This  
355 result illustrates again the stability of the general temporal trend (decline) of speciation rates  
356 to different fitting approaches. It also illustrates the potential use of congruent models to  
357 generate new hypotheses. Here for example, the inferred dynamics suggest to formulate a  
358 model with a declining background speciation rate combined with a local burst of speciation  
359 around 7 Myrs ago.

360 Using a spline of degree 2, the AIC criterion selected only 1 time on the grid (i.e a  
361 constant  $r_p$ ), and the resulting diversification dynamics are shown in Fig. S2. The model that  
362 assumes  $\lambda$  is constant infers negative extinction rates, and is therefore not plausible. The  
363 model that assumes  $\mu$  is constant infers a general tendency for a decline in speciation rates  
364 that tends to accelerate over time. This result illustrates first that the estimation of  $r_p$  (and the  
365 resulting dynamics of  $\lambda$  when assuming  $\mu$  constant) depends on specific hypotheses made  
366 when fitting  $r_p$  (compare with Fig. S1). Second, it illustrates one more time the stability of the  
367 general temporal trend (decline) of speciation rates to different fitting approaches/choices. It  
368 also provides another illustration of the potential use of congruent models to generate new  
369 hypotheses. Here, the inferred dynamics suggest to formulate a model with a slow decline in  
370 speciation rates at the origin of the clade, that accelerates towards the present.

371

372

373



374 **Supplementary References**

375

376 22. Kapur, J. N. Maximum-entropy models in science and engineering. *John Wiley & Sons*.

377 (1989).

378 23. May, M. R., Höhna, S., & Moore, B. R. A Bayesian approach for detecting the impact of

379 mass-extinction events on molecular phylogenies when rates of lineage diversification

380 may vary. *Methods Ecol. Evol.* **7**, 947-959 (2016).

381 24. Louca, S. & Doebeli, M. Efficient comparative phylogenetics on large trees.

382 *Bioinformatics* **34**, 1053–1055 (2018).

383 25. Arlot, S., Celisse, A., & Harchaoui, Z. A Kernel Multiple Change-point Algorithm via

384 Model Selection. *J. Mach. Learn. Res.* **20**, 1-56 (2019).

385

386

387

388

389

390

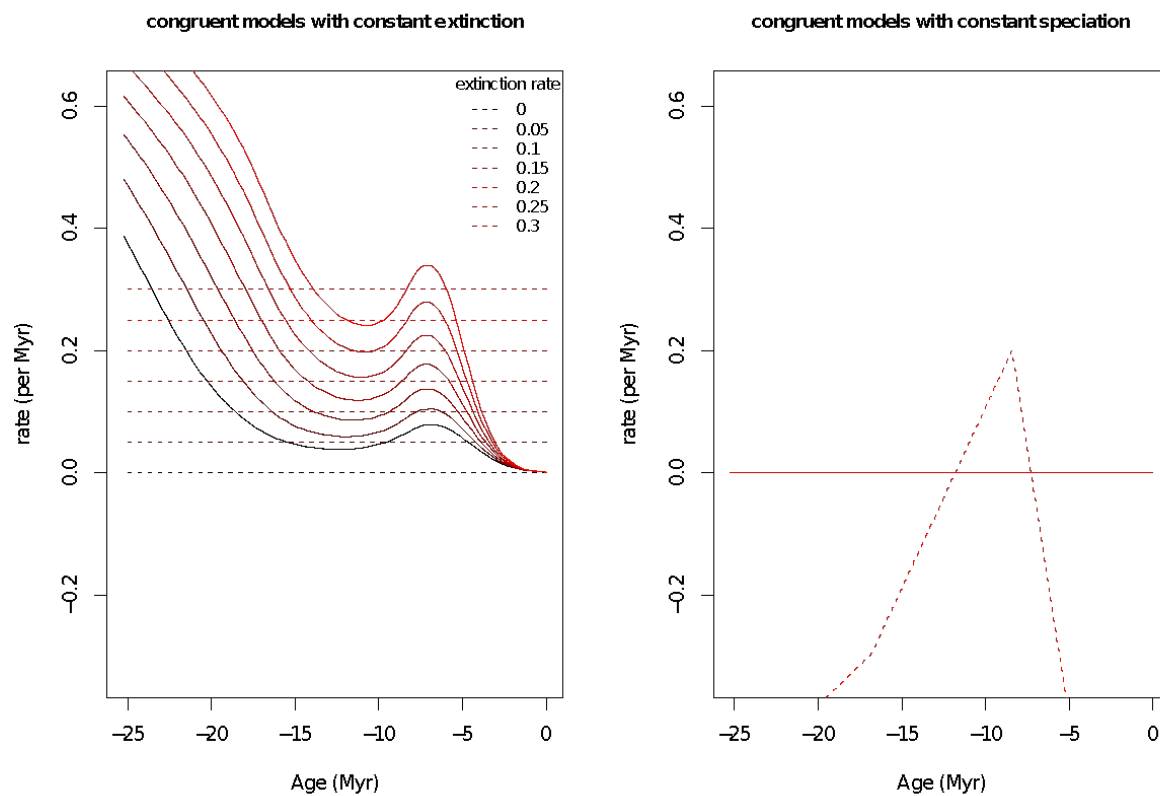

391

392 **Figure S1 Diversification of the Madagascan vangas as inferred by directly fitting  $r_p$ .**

393 Here  $r_p$  is fitted with a spline of degree 1 (piecewise linear), with 3 evenly-spaced times

394 (selected based on AIC). The curves on the left panel represent the dynamics of speciation

395 (plain line) and extinction (dashed line) obtained by: fixing increasing values of a constant

396 extinction rate (left panel) and fixing the speciation rate to  $\lambda_0$  (right panel).

397

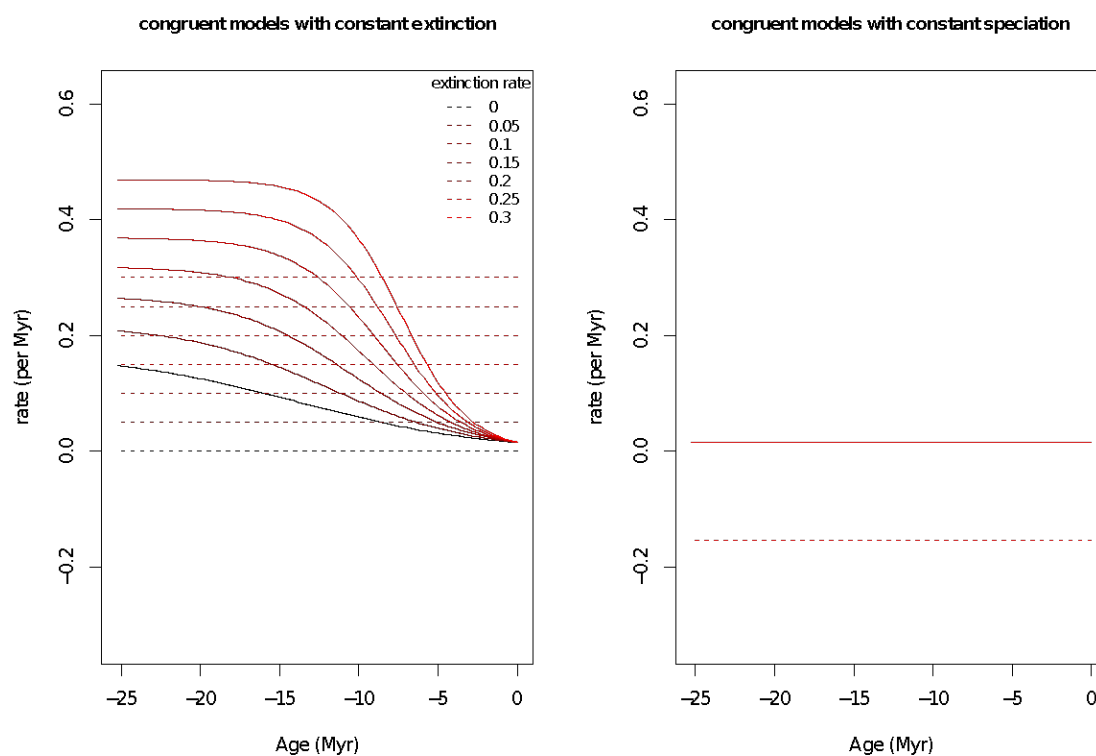

398

399 **Figure S2 Diversification of the Madagascan vangas as inferred by directly fitting  $r_p$ .**

400 Here  $r_p$  is fitted with a spline of degree 2 with 1 time (selected based on AIC, i.e.  $r_p$  is

401 constant). The curves on the left panel represent the dynamics of speciation (plain line) and

402 extinction (dashed line) obtained by: fixing increasing values of a constant extinction rate (left

403 panel) and fixing the speciation rate to  $\lambda_0$  (right panel).

404

405

406

407
